# Supplementary material for: Consideration of Nevirapine Analogs To Reduce Metabolically Linked Hepatotoxicity: A Cautionary Tale of the Deuteration Approach
Source: PubMed Central journal article supplement — Chem Res Toxicol. 2023 Sep 28;36(10):1631–42. doi: 10.1021/acs.chemrestox.3c00192 (PMC10583834; doi:10.1021/acs.chemrestox.3c00192), 2023-09-28
Supplement: tx3c00192_si_001.pdf [file tx3c00192_si_001.pdf]

## SUPPORTING INFORMATION

# Consideration of nevirapine analogs to reduce metabolically linked hepatotoxicity: a cautionary tale of the deuteration approach

*Sylvie E. Kandel<sup>†</sup>, Emily G. Gracey<sup>†</sup> and Jed N. Lampe\**

Department of Pharmaceutical Sciences, Skaggs School of Pharmacy, University of Colorado,  
Aurora, Colorado 80045, United States.

<sup>†</sup> Indicates that these authors contributed equally to this work and are therefore listed as co-first authors of the manuscript.

\* Corresponding author; please direct all correspondence to: [jed.lampe@cuanschutz.edu](mailto:jed.lampe@cuanschutz.edu)

| <b>Table of Contents:</b>                                                                                | <b>Page</b> |
|----------------------------------------------------------------------------------------------------------|-------------|
| <b>Figure S1.</b> Dose-response curve of 12-hydroxy-NVP against HIV reverse transcriptase. ....          | S3          |
| <b>Figure S2.</b> Hepatocyte LDH cytotoxicity. ....                                                      | S4          |
| <b>Figure S3.</b> Representative UV and MRM chromatograms for NVP hydroxy metabolite standards.<br>..... | S5          |
| <b>Figure S4.</b> NVP and 12-d <sub>3</sub> -NVP metabolism in HLMs .....                                | S6          |

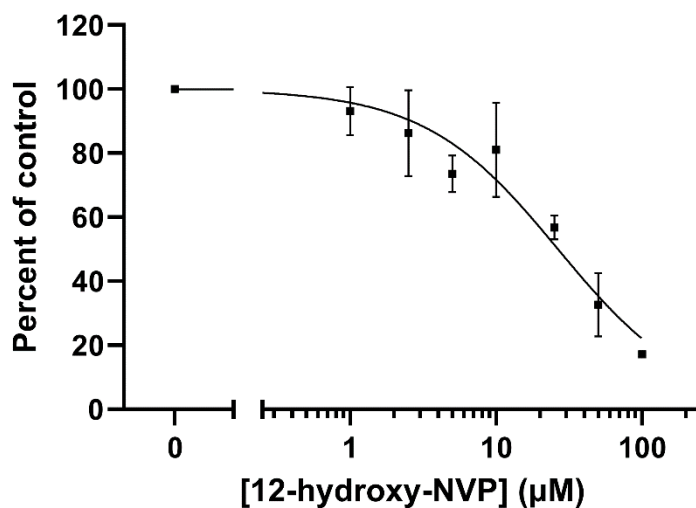

**Figure S1.** Dose-response curve of 12-hydroxy-NVP against HIV reverse transcriptase. HIV-RT inhibition by 12OH-NVP was characterized by an  $IC_{50}$  value  $\pm$  standard error of  $26.5 \pm 3.3 \mu\text{M}$  ( $R^2 = 0.899$ ). Each data point represents the average of triplicate measurements, with error bars representing standard deviations.

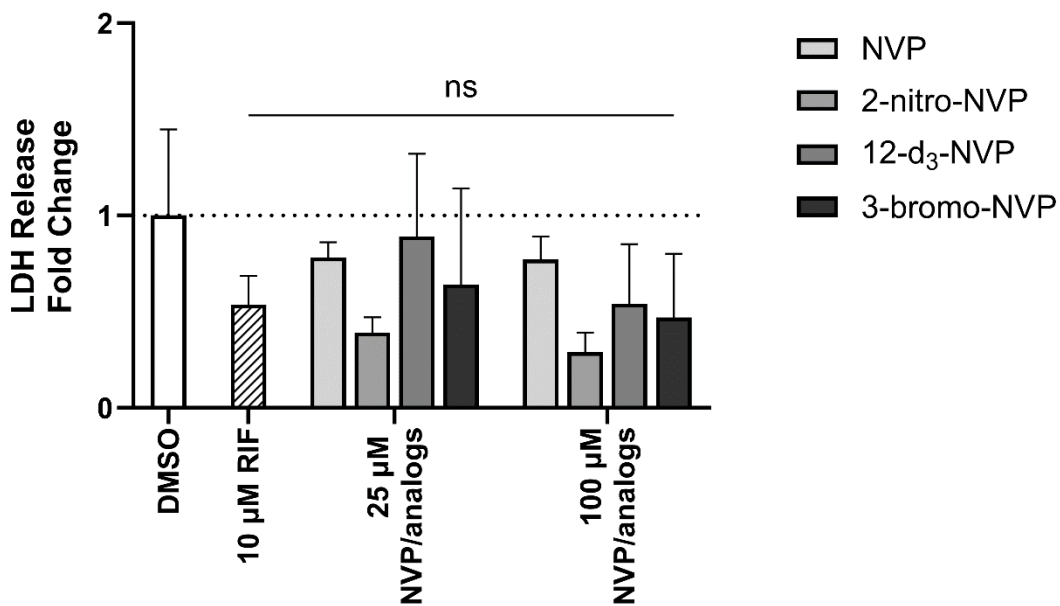

**Figure S2.** Hepatocyte LDH cytotoxicity. Normalized LDH release at 72 h for primary hepatocytes treated with 25 and 100 μM NVP, 12-d<sub>3</sub>-NVP, 2-nitro-NVP, 3-bromo-NVP, and controls 10 μM RIF (rifampicin) and DMSO. The LDH release fold changes were calculated compared to the DMSO control. Bars represent the means of at least three biological replicates ± standard deviation. Data were analyzed by one-way ANOVA against the DMSO control and no statistically significant (ns) differences were observed.

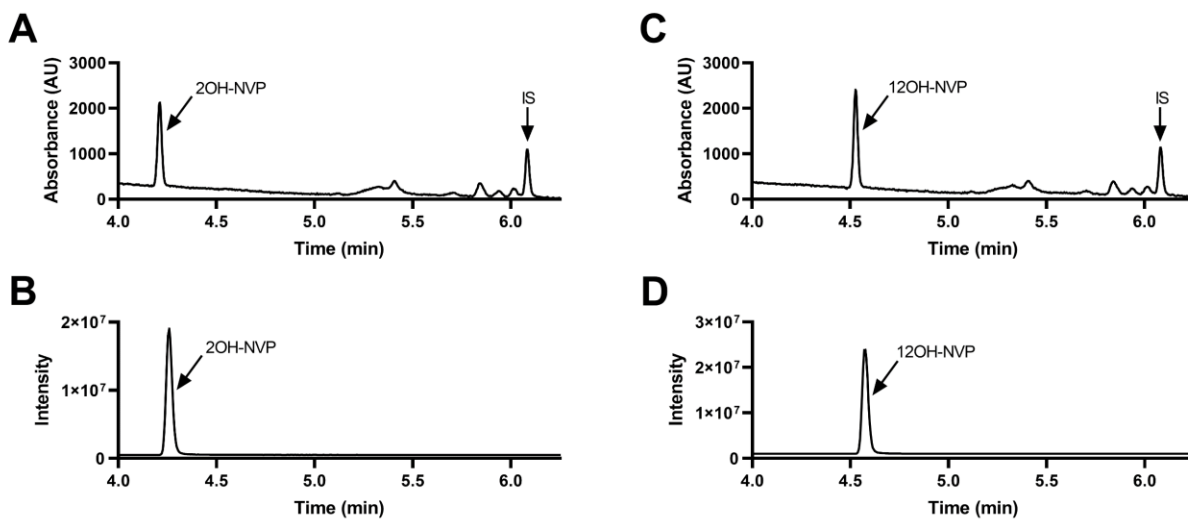

**Figure S3.** NVP hydroxy metabolite standards. Representative UV (A, C) and MRM (B, D) chromatograms for the 2OH-NVP (A, B) and 12OH-NVP (C, D) standards prepared at 1  $\mu$ M in matrix. For the extracted MRM chromatograms, the mass transitions were 283>161 and 283>223 for 2OH-NVP (B) and 12OH-NVP (D), respectively.

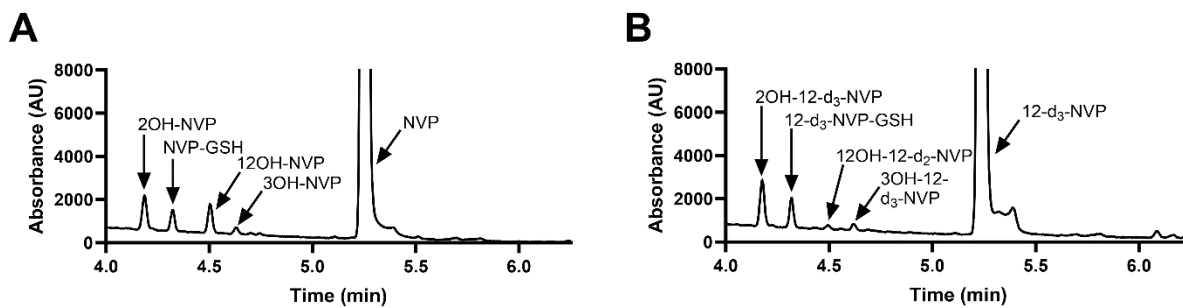

**Figure S4.** NVP and 12-d<sub>3</sub>-NVP metabolism in HLMs. Representative UV chromatograms (280 nm) for NVP (A) and 12-d<sub>3</sub>-NVP (B) incubated at 100  $\mu$ M for 60 min with adult pooled HLMs (1 mg/mL) in presence of the co-factor NADPH.
